# Supplementary material
Source: PubMed Central journal article supplement (PMC6287630)
Supplement: NIHMS991172-supplement-1.pdf [file NIHMS991172-supplement-1.pdf]

**Table S1** Raw data, including sample ID, type and location of sample, and *Salmonella* and *E. coli* most probable number (MPN)

| Sample ID | Farm   | Map code  | Sample type             | Sample location | <i>Salmonella</i>           | <i>E. coli</i>              |
|-----------|--------|-----------|-------------------------|-----------------|-----------------------------|-----------------------------|
|           |        |           |                         |                 | (MPN 100 ml <sup>-1</sup> ) | (MPN 100 ml <sup>-1</sup> ) |
| P10H      | Farm_1 | Farm_1_A1 | Runoff from fields      | Peanut field    | 0.1653                      | 4724.7                      |
| P12H      | Farm_1 | Farm_1_A1 | Runoff from fields      | Peanut field    | 0.2025                      | 57940.0                     |
| P2H       | Farm_1 | Farm_1_A1 | Runoff from fields      | Peanut field    | 0.0274                      | 547.5                       |
| P4H       | Farm_1 | Farm_1_A1 | Runoff from fields      | Peanut field    | 0.0274                      | 4838.4                      |
| P6H       | Farm_1 | Farm_1_A1 | Runoff from fields      | Peanut field    | 0.0274                      | 4838.4                      |
| P8H       | Farm_1 | Farm_1_A1 | Runoff from fields      | Peanut field    | 0.1742                      | 7270.0                      |
| P10K      | Farm_1 | Farm_1_A2 | Runoff from fields      | Tomato field    | 0.0274                      | 19862.8                     |
| P12K      | Farm_1 | Farm_1_A2 | Runoff from fields      | Tomato field    | 0.0638                      | 155307.0                    |
| P6K       | Farm_1 | Farm_1_A2 | Runoff from fields      | Tomato field    | 0.0562                      | 40.2                        |
| P10E      | Farm_1 | Farm_1_F1 | Runoff from forests     | Forested yard   | 0.0548                      | 1235.9                      |
| P12E      | Farm_1 | Farm_1_F1 | Runoff from forests     | Forested yard   | 0.4843                      | 5005.2                      |
| P2E       | Farm_1 | Farm_1_F1 | Runoff from forests     | Forested yard   | 0.0274                      | 91.0                        |
| P4E       | Farm_1 | Farm_1_F1 | Runoff from forests     | Forested yard   | 0.0274                      | 107.9                       |
| P6E       | Farm_1 | Farm_1_F1 | Runoff from forests     | Forested yard   | 0.0274                      | 2942.5                      |
| P10F      | Farm_1 | Farm_1_F2 | Runoff from forests     | Pine forest     | 0.7385                      | 1060.2                      |
| P12F      | Farm_1 | Farm_1_F2 | Runoff from forests     | Pine forest     | 0.2025                      | 12996.5                     |
| P2F       | Farm_1 | Farm_1_F2 | Runoff from forests     | Pine forest     | 0.0274                      | 435.2                       |
| P4F       | Farm_1 | Farm_1_F2 | Runoff from forests     | Pine forest     | 0.0638                      | 585.8                       |
| P6F       | Farm_1 | Farm_1_F2 | Runoff from forests     | Pine forest     | 0.0638                      | 4838.4                      |
| P8F       | Farm_1 | Farm_1_F2 | Runoff from forests     | Pine forest     | 0.0274                      | 24192.0                     |
| P10G      | Farm_1 | Farm_1_F3 | Runoff from forests     | Mixed forest    | 11.0000                     | 24192.0                     |
| P12G      | Farm_1 | Farm_1_F3 | Runoff from forests     | Mixed forest    | 11.0000                     | 2607.0                      |
| P2G       | Farm_1 | Farm_1_F3 | Runoff from forests     | Mixed forest    | 0.1332                      | 24.6                        |
| P4G       | Farm_1 | Farm_1_F3 | Runoff from forests     | Mixed forest    | 0.0274                      |                             |
| P8G       | Farm_1 | Farm_1_F3 | Runoff from forests     | Mixed forest    | 0.0274                      | 457.2                       |
| P10B      | Farm_1 | Farm_1_P1 | Pond after storms       | Pond at intake  | 0.5604                      | 161.5                       |
| P12B      | Farm_1 | Farm_1_P1 | Pond after storms       | Pond at intake  | 2.3982                      | 15.9                        |
| P2B       | Farm_1 | Farm_1_P1 | Pond after storms       | Pond at intake  | 0.0274                      | 365.4                       |
| P4B       | Farm_1 | Farm_1_P1 | Pond after storms       | Pond at intake  | 0.0274                      | 41                          |
| P6B       | Farm_1 | Farm_1_P1 | Pond after storms       | Pond at intake  | 0.0274                      | 30.9                        |
| P8B       | Farm_1 | Farm_1_P1 | Pond after storms       | Pond at intake  | 0.1581                      | 57.6                        |
| P10A      | Farm_1 | Farm_1_P1 | Pond before storms      | Pond at intake  | 0.0638                      | 47.8                        |
| P12A      | Farm_1 | Farm_1_P1 | Pond before storms      | Pond at intake  | 0.2448                      | 24.3                        |
| P2A       | Farm_1 | Farm_1_P1 | Pond before storms      | Pond at intake  | 0.0274                      | 12.8                        |
| P4A       | Farm_1 | Farm_1_P1 | Pond before storms      | Pond at intake  | 0.0274                      | 3.6                         |
| P6A       | Farm_1 | Farm_1_P1 | Pond before storms      | Pond at intake  | 0.0274                      | 2.0                         |
| P8A       | Farm_1 | Farm_1_P1 | Pond before storms      | Pond at intake  | 0.0274                      | 0.5                         |
| P10D      | Farm_1 | Farm_1_P2 | Pond after storms       | Pond edges      | 0.0274                      | 224.7                       |
| P12D      | Farm_1 | Farm_1_P2 | Pond after storms       | Pond edges      | 10.9895                     | 104.6                       |
| P2D       | Farm_1 | Farm_1_P2 | Pond after storms       | Pond edges      | 0.0274                      | 275.5                       |
| P4D       | Farm_1 | Farm_1_P2 | Pond after storms       | Pond edges      | 0.0638                      | 39.9                        |
| P6D       | Farm_1 | Farm_1_P2 | Pond after storms       | Pond edges      | 0.2555                      | 47.1                        |
| P8D       | Farm_1 | Farm_1_P2 | Pond after storms       | Pond edges      | 0.1332                      | 73.3                        |
| P10C      | Farm_1 | Farm_1_P2 | Pond before storms      | Pond edges      | 0.0274                      | 91.2                        |
| P12C      | Farm_1 | Farm_1_P2 | Pond before storms      | Pond edges      | 0.0274                      | 325.5                       |
| P2C       | Farm_1 | Farm_1_P2 | Pond before storms      | Pond edges      | 0.0274                      | 14.6                        |
| P4C       | Farm_1 | Farm_1_P2 | Pond before storms      | Pond edges      | 0.0274                      | 3.1                         |
| P6C       | Farm_1 | Farm_1_P2 | Pond before storms      | Pond edges      | 0.0562                      | 2.0                         |
| P8C       | Farm_1 | Farm_1_P2 | Pond before storms      | Pond edges      | 0.0562                      | 3.1                         |
| P10I      | Farm_1 | Farm_1_S1 | Storm flow from streams | Stream          | 0.4843                      | 2065.8                      |
| P12I      | Farm_1 | Farm_1_S1 | Storm flow from streams | Stream          | 0.9857                      | 301.8                       |
| P2I       | Farm_1 | Farm_1_S1 | Storm flow from streams | Stream          | 0.5604                      | 686.7                       |
| P4I       | Farm_1 | Farm_1_S1 | Storm flow from streams | Stream          | 0.9857                      | 46.1                        |
| P6I       | Farm_1 | Farm_1_S1 | Storm flow from streams | Stream          | 0.5136                      | 585.7                       |

|      |        |           |                         |                |         |         |
|------|--------|-----------|-------------------------|----------------|---------|---------|
| P8I  | Farm_1 | Farm_1_S1 | Storm flow from streams | Stream         | 1.5005  | 37.3    |
| P10J | Farm_1 | Farm_1_S2 | Storm flow from streams | Road ditch     | 0.5083  | 2454.7  |
| P12J | Farm_1 | Farm_1_S2 | Storm flow from streams | Road ditch     | 0.3713  | 14136.0 |
| P6J  | Farm_1 | Farm_1_S2 | Storm flow from streams | Road ditch     | 0.3725  | 4838.4  |
| P11E | Farm_2 | Farm_2_A1 | Runoff from fields      | Biofuel field  | 0.0274  | 1479.5  |
| P1E  | Farm_2 | Farm_2_A1 | Runoff from fields      | Biofuel field  | 0.0274  | 44.3    |
| P3E  | Farm_2 | Farm_2_A1 | Runoff from fields      | Biofuel field  | 0.0274  | 141.4   |
| P5E  | Farm_2 | Farm_2_A1 | Runoff from fields      | Biofuel field  | 0.0274  | 1355.6  |
| P7E  | Farm_2 | Farm_2_A1 | Runoff from fields      | Biofuel field  | 0.0638  | 4838.4  |
| P9E  | Farm_2 | Farm_2_A1 | Runoff from fields      | Biofuel field  | 0.0638  | 8734.5  |
| P11I | Farm_2 | Farm_2_A2 | Runoff from fields      | Peanuts/cotton | 0.0274  | 24192.0 |
| P1I  | Farm_2 | Farm_2_A2 | Runoff from fields      | Peanuts/cotton | 0.0274  | 28.5    |
| P3I  | Farm_2 | Farm_2_A2 | Runoff from fields      | Peanuts/cotton | 0.0274  | 648.8   |
| P9I  | Farm_2 | Farm_2_A2 | Runoff from fields      | Peanuts/cotton | 0.0274  | 94.1    |
| P11F | Farm_2 | Farm_2_F1 | Runoff from forests     | Shrubland      | 0.0274  | 4838.4  |
| P1F  | Farm_2 | Farm_2_F1 | Runoff from forests     | Shrubland      | 0.0274  | 435.2   |
| P3F  | Farm_2 | Farm_2_F1 | Runoff from forests     | Shrubland      | 0.0548  | 2419.2  |
| P5F  | Farm_2 | Farm_2_F1 | Runoff from forests     | Shrubland      | 0.0274  | 1293.7  |
| P7F  | Farm_2 | Farm_2_F1 | Runoff from forests     | Shrubland      | 0.0274  | 1012.6  |
| P9F  | Farm_2 | Farm_2_F1 | Runoff from forests     | Shrubland      | 0.0274  | 189.6   |
| P11G | Farm_2 | Farm_2_F2 | Runoff from forests     | Mixed forest   | 0.0274  | 483.1   |
| P1G  | Farm_2 | Farm_2_F2 | Runoff from forests     | Mixed forest   | 0.0274  | 2419.2  |
| P3G  | Farm_2 | Farm_2_F2 | Runoff from forests     | Mixed forest   | 0.0274  | 727.0   |
| P5G  | Farm_2 | Farm_2_F2 | Runoff from forests     | Mixed forest   | 0.0274  | 40.7    |
| P7G  | Farm_2 | Farm_2_F2 | Runoff from forests     | Mixed forest   | 0.0274  | 615.2   |
| P9G  | Farm_2 | Farm_2_F2 | Runoff from forests     | Mixed forest   | 0.0562  | 4838.4  |
| P11B | Farm_2 | Farm_2_P1 | Pond after storms       | Pond at intake | 0.0274  | 4.1     |
| P1B  | Farm_2 | Farm_2_P1 | Pond after storms       | Pond at intake | 0.0638  | 71.2    |
| P3B  | Farm_2 | Farm_2_P1 | Pond after storms       | Pond at intake | 0.0274  | 9.8     |
| P5B  | Farm_2 | Farm_2_P1 | Pond after storms       | Pond at intake | 0.9857  | 7.2     |
| P7B  | Farm_2 | Farm_2_P1 | Pond after storms       | Pond at intake | 0.2555  | 7.4     |
| P9B  | Farm_2 | Farm_2_P1 | Pond after storms       | Pond at intake | 0.0274  | 14.3    |
| P11A | Farm_2 | Farm_2_P1 | Pond before storms      | Pond at intake | 0.0274  | 86.0    |
| P1A  | Farm_2 | Farm_2_P1 | Pond before storms      | Pond at intake | 0.0274  | 5.8     |
| P3A  | Farm_2 | Farm_2_P1 | Pond before storms      | Pond at intake | 0.0274  | 8.6     |
| P5A  | Farm_2 | Farm_2_P1 | Pond before storms      | Pond at intake | 0.0274  | 2.5     |
| P7A  | Farm_2 | Farm_2_P1 | Pond before storms      | Pond at intake | 0.0638  | 0.5     |
| P9A  | Farm_2 | Farm_2_P1 | Pond before storms      | Pond at intake | 0.0274  | 2.5     |
| P11D | Farm_2 | Farm_2_P2 | Pond after storms       | Pond edges     | 0.0548  | 7.4     |
| P1D  | Farm_2 | Farm_2_P2 | Pond after storms       | Pond edges     | 0.0274  | 44.8    |
| P3D  | Farm_2 | Farm_2_P2 | Pond after storms       | Pond edges     | 0.0274  | 24.0    |
| P5D  | Farm_2 | Farm_2_P2 | Pond after storms       | Pond edges     | 1.5005  | 8.4     |
| P7D  | Farm_2 | Farm_2_P2 | Pond after storms       | Pond edges     | 0.1581  | 0.5     |
| P9D  | Farm_2 | Farm_2_P2 | Pond after storms       | Pond edges     | 0.1581  | 48.8    |
| P11C | Farm_2 | Farm_2_P2 | Pond before storms      | Pond edges     | 0.0274  | 33.5    |
| P1C  | Farm_2 | Farm_2_P2 | Pond before storms      | Pond edges     | 0.0638  | 6.3     |
| P3C  | Farm_2 | Farm_2_P2 | Pond before storms      | Pond edges     | 0.0274  |         |
| P5C  | Farm_2 | Farm_2_P2 | Pond before storms      | Pond edges     | 0.3713  | 7.4     |
| P7C  | Farm_2 | Farm_2_P2 | Pond before storms      | Pond edges     | 0.0274  | 4.1     |
| P9C  | Farm_2 | Farm_2_P2 | Pond before storms      | Pond edges     | 0.0562  | 2.0     |
| P9J  | Farm_2 | Farm_2_S  | Storm flow from streams | Stream         | 10.9895 | 19862.8 |
| P11J | Farm_2 | Farm_2_S  | Storm flow from streams | Stream         | 0.2025  | 3974.2  |
| P7J  | Farm_2 | Farm_2_S  | Storm flow from streams | Stream         | 0.2555  | 3195.9  |
